# Supplementary material for: Saponin and Fatty Acid Profiling of the Sea Cucumber Holothuria atra, α-Glucosidase Inhibitory Activity and the Identification of a Novel Triterpene Glycoside
Source: MDPI journal article supplement (doi:10.3390/nu15041033), 2023-02-19
Supplement: s1 [file s1]

# Saponin and Fatty Acid Profiling of the Sea Cucumber *Holothuria atra*, $\alpha$ -Glucosidase Inhibitory Activity and the Identification of a Novel Triterpene Glycoside

**Yunita Eka Puspitasari <sup>1,2,3,\*</sup>, Emmy Tuenter <sup>1</sup>, Kenn Foubert <sup>1</sup>, Herawati Herawati <sup>4</sup>, Anik Martinah Hariati <sup>5</sup>, Aulanni'am Aulanni'am <sup>6</sup>, Luc Pieters <sup>1</sup>, Tess De Bruyne <sup>1</sup> and Nina Hermans <sup>1,\*</sup>**

## SUPPLEMENTARY MATERIALS

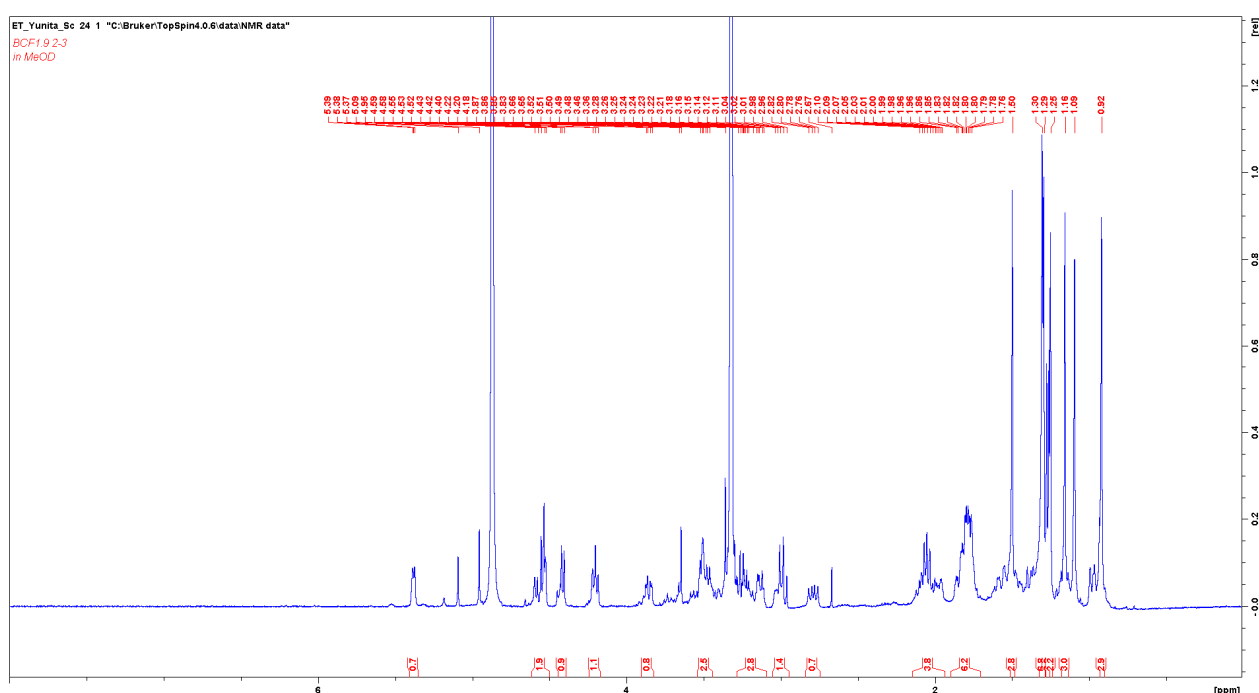

**Figure S1.**  $^1\text{H}$  NMR spectrum of compound **1** (desholothurin B) in  $\text{CD}_3\text{OD}$ .

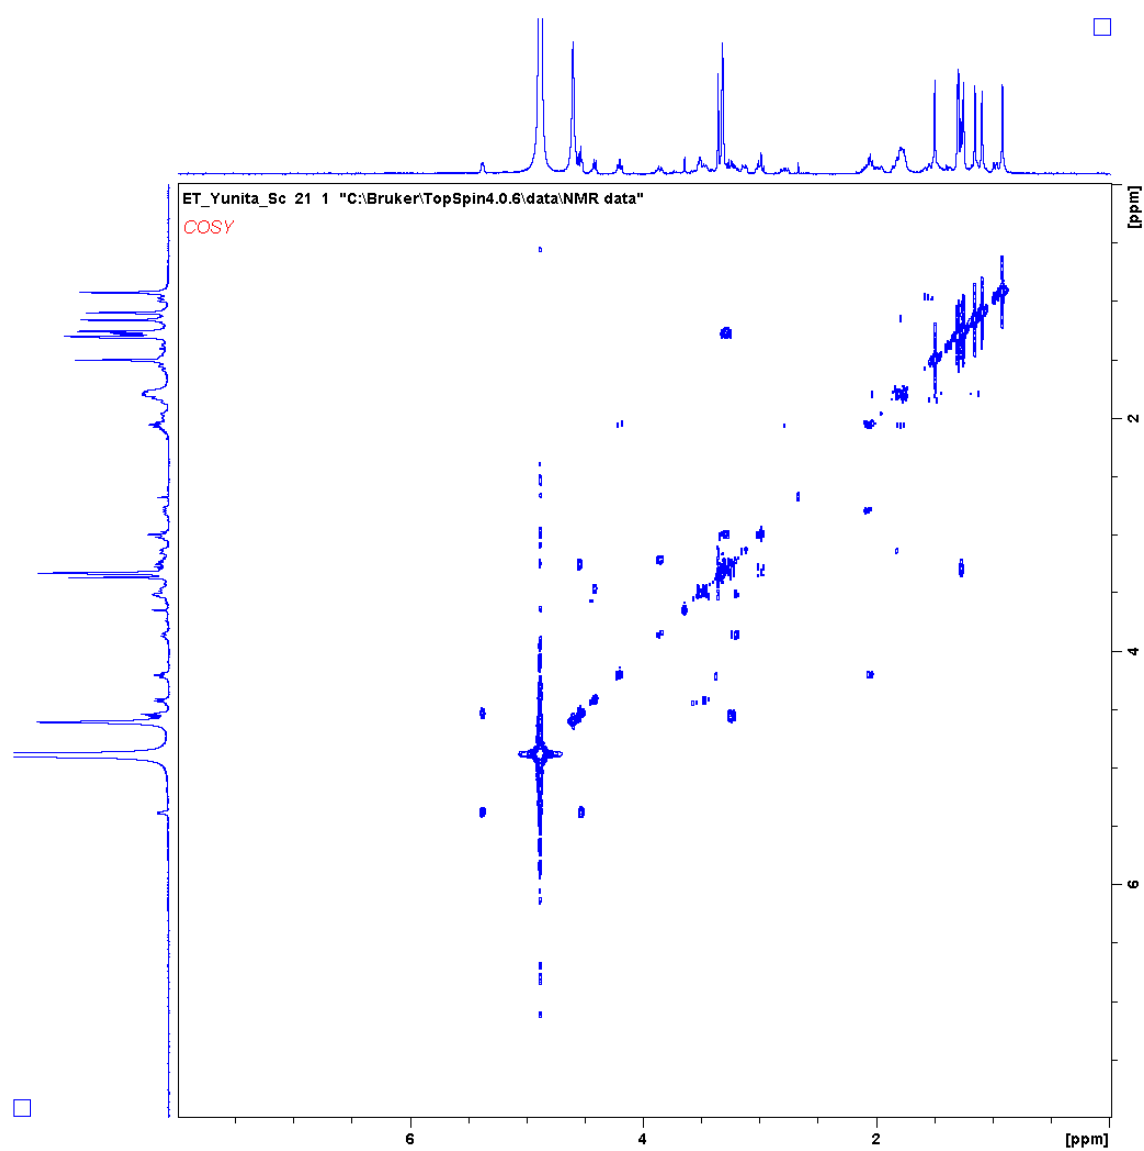

**Figure S2.** COSY spectrum of compound **1** (desholothurin B) in CD<sub>3</sub>OD.

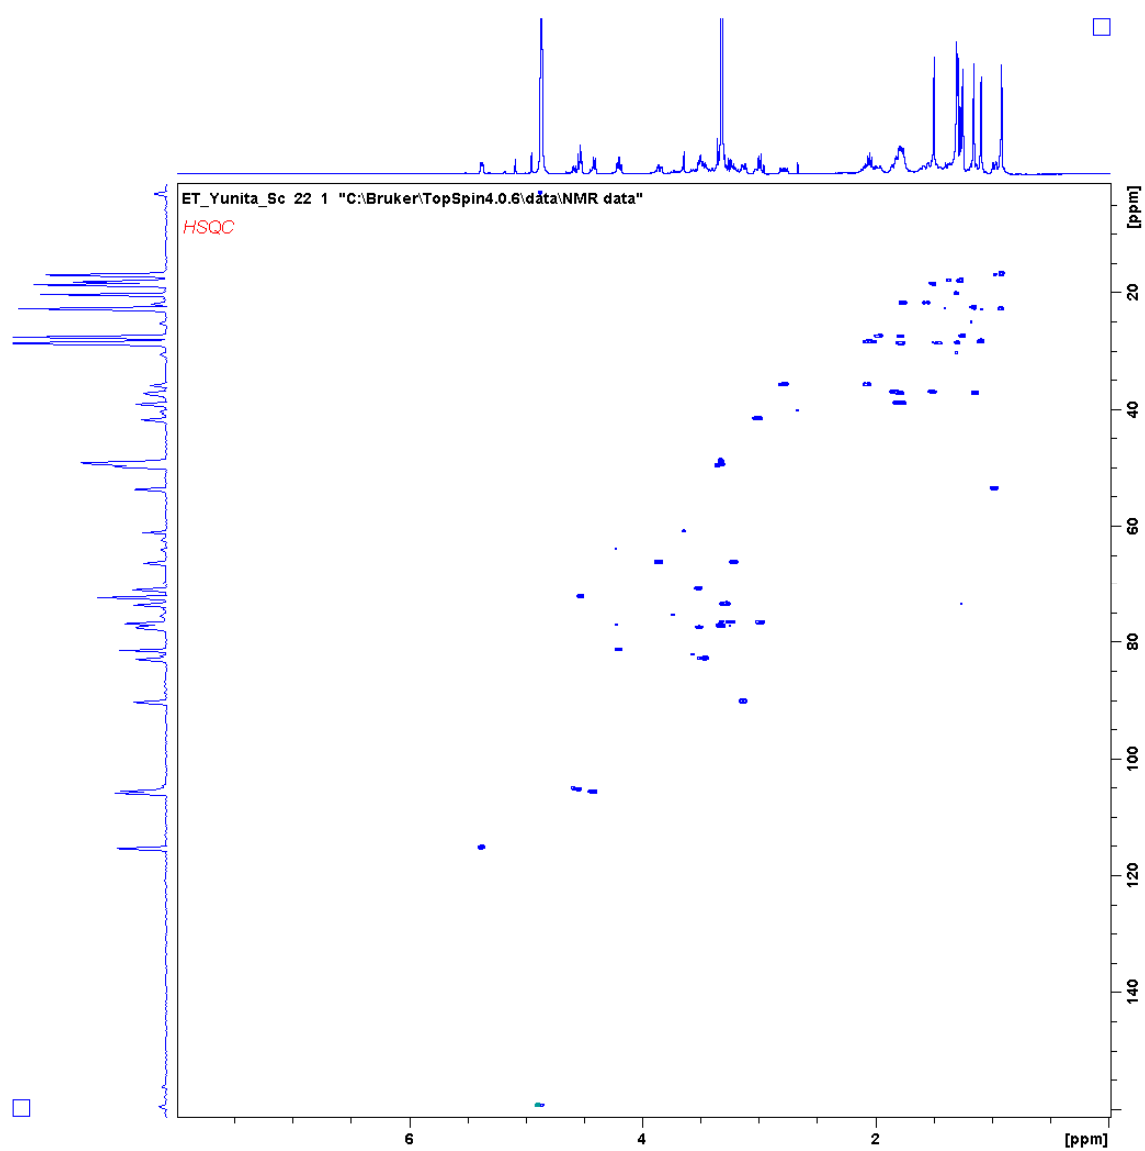

**Figure S3.** HSQC spectrum of compound **1** (desholothurin B) in CD<sub>3</sub>OD.

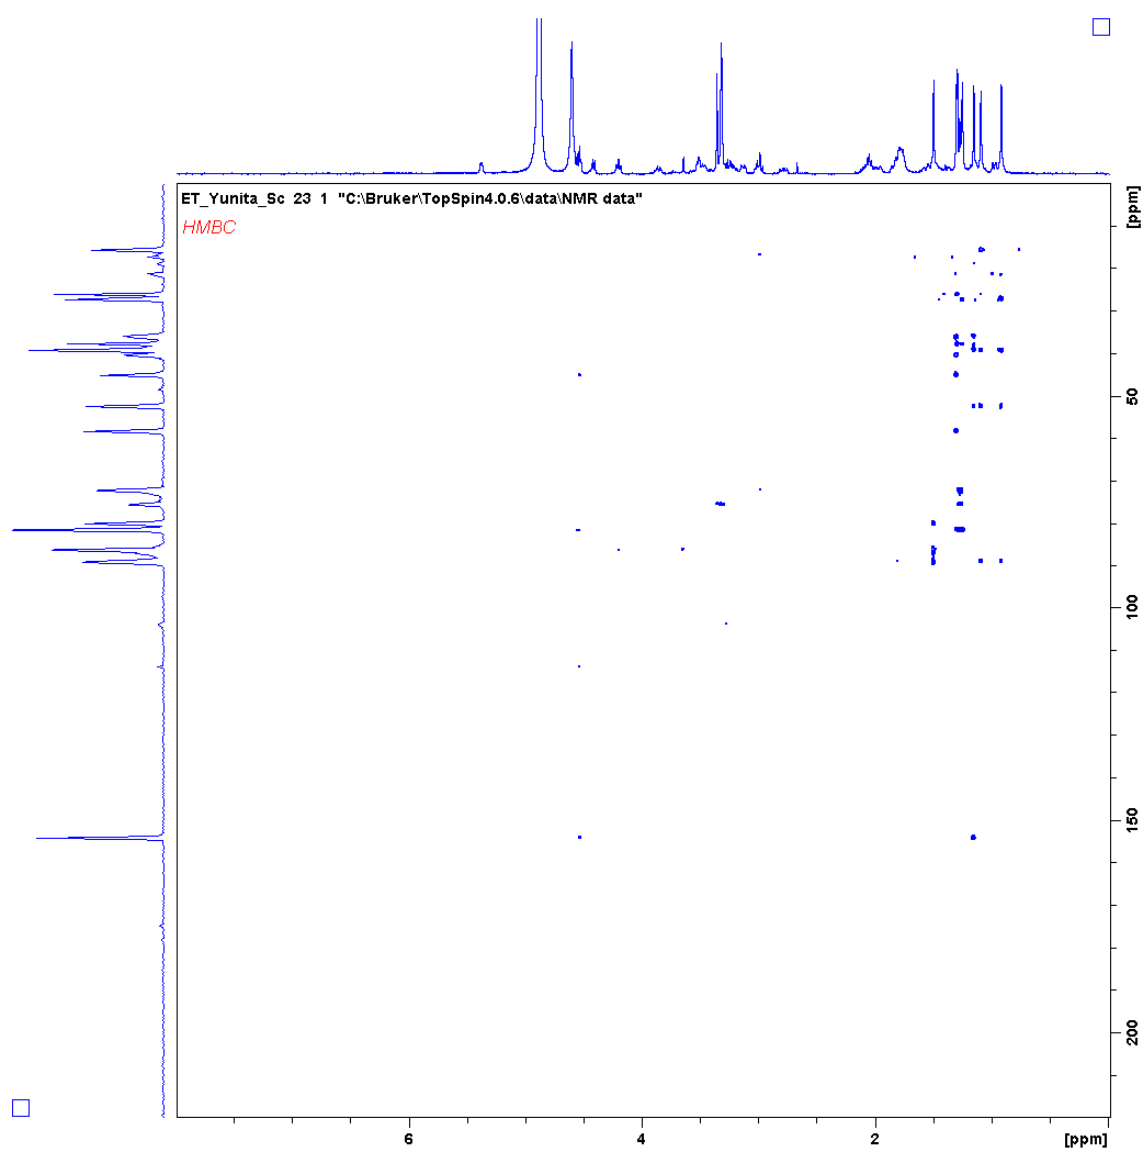

**Figure S4.** HMBC spectrum of compound **1** (desholothurin B) in CD<sub>3</sub>OD.

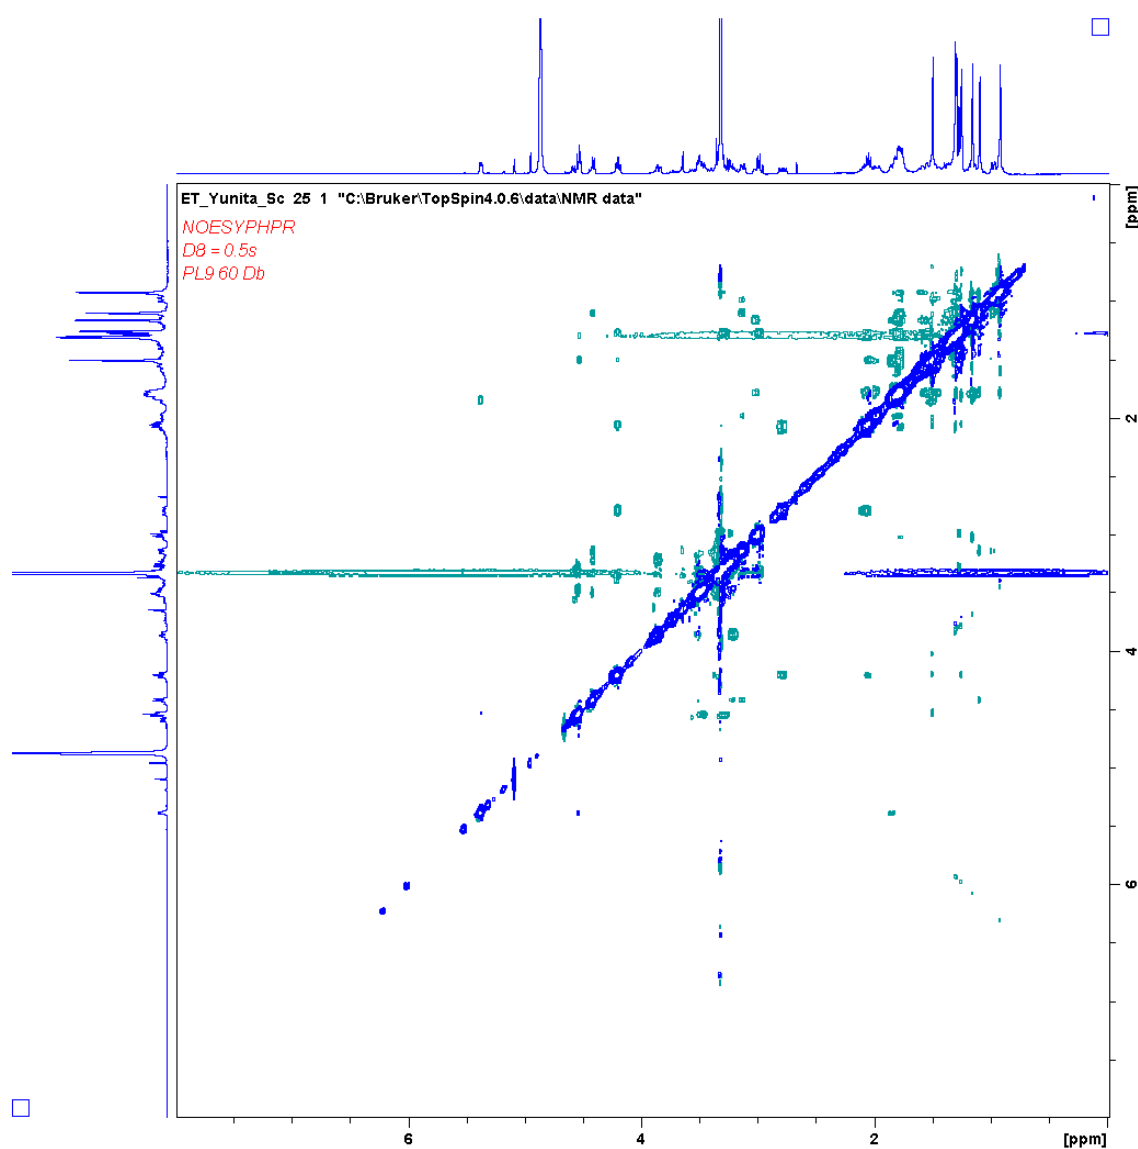

**Figure S5.** NOESY spectrum of compound **1** (desholothurin B) in CD<sub>3</sub>OD

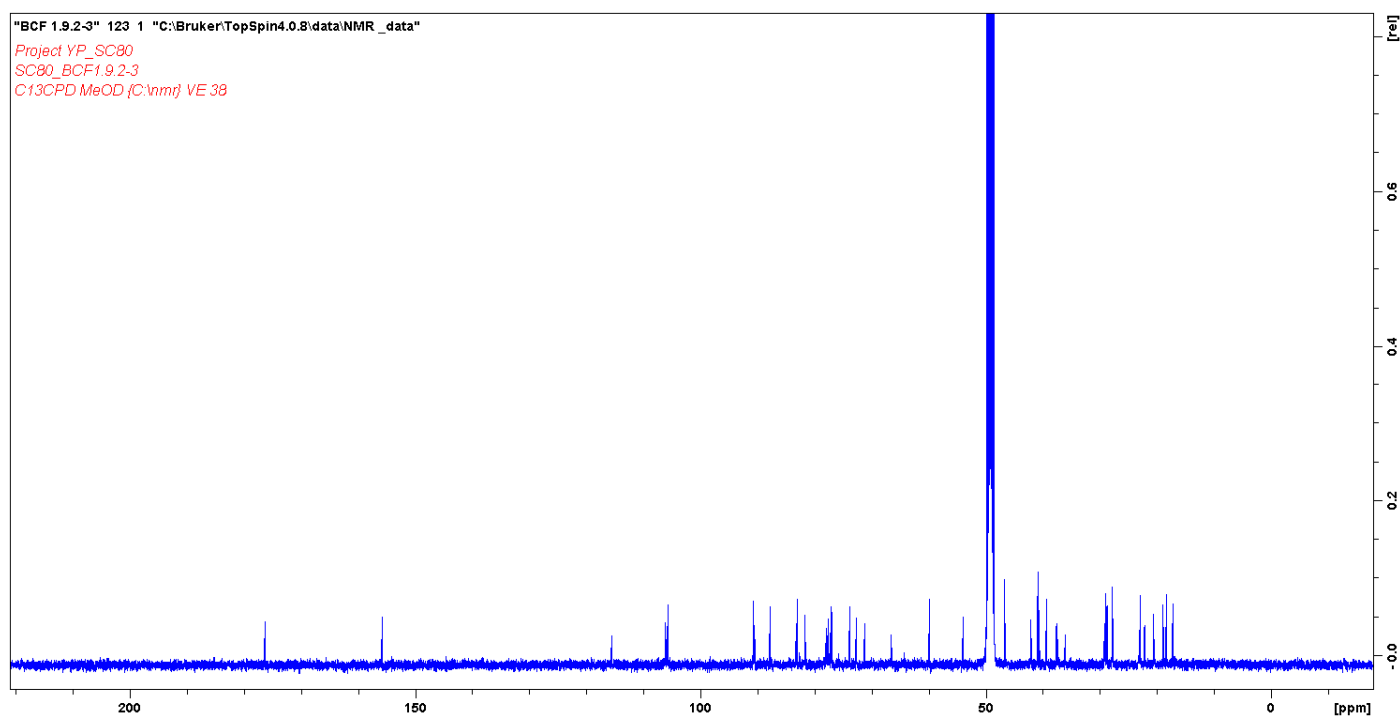

**Figure S6.**  $^{13}\text{C}$  spectrum of compound **1** (desholothurin B) in  $\text{CD}_3\text{OD}$ .

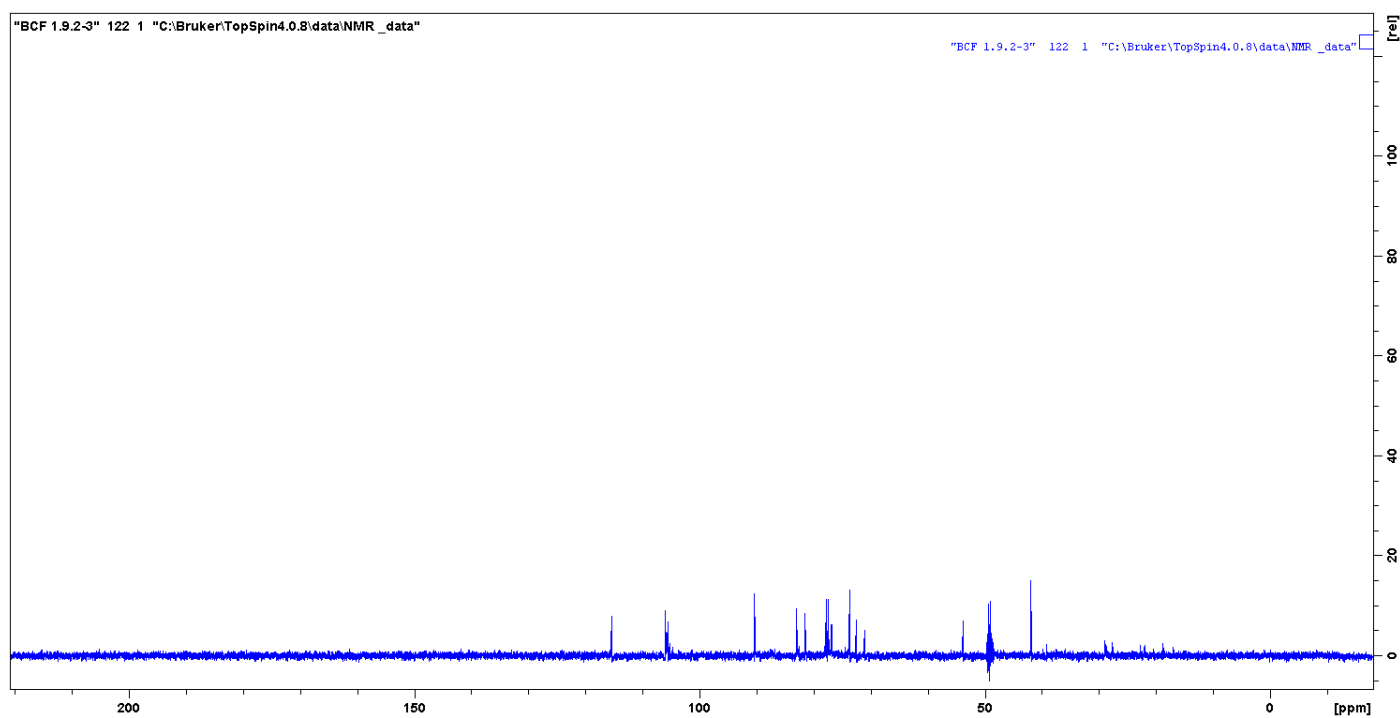

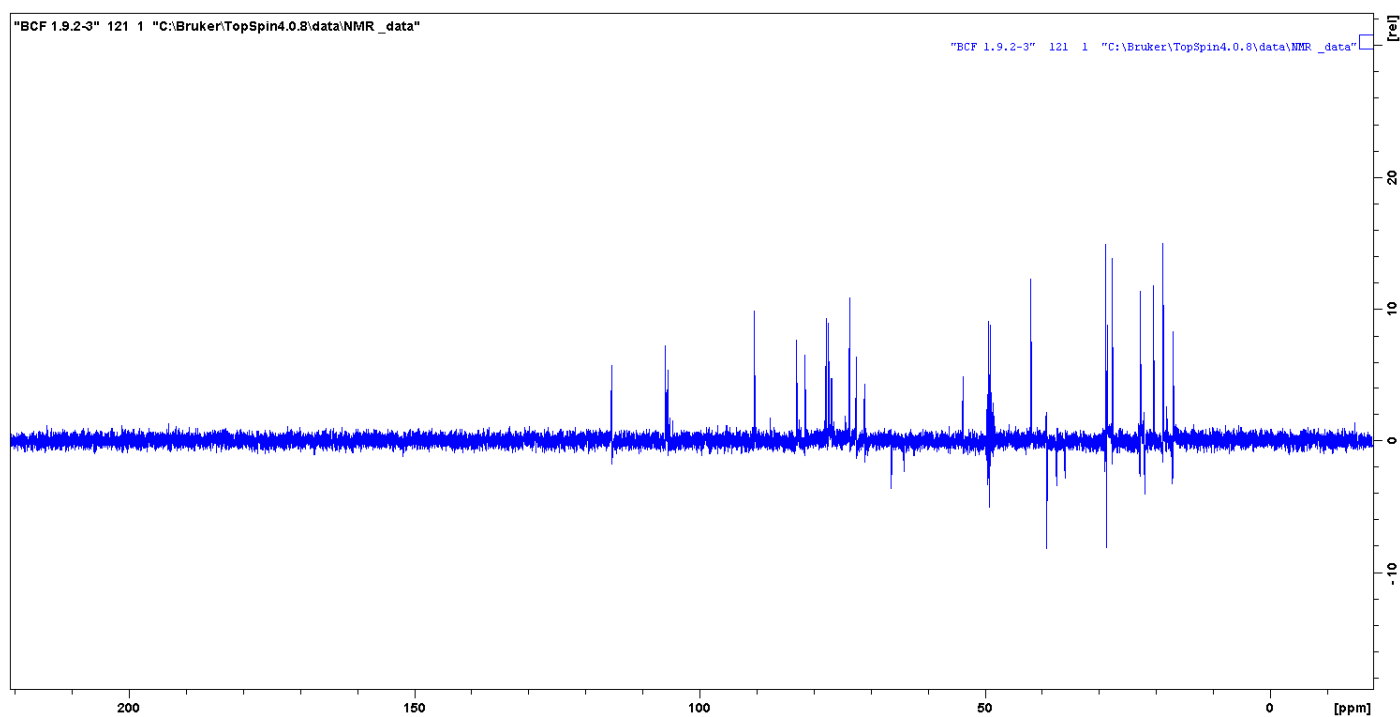

**Figure S8.**  $^{13}\text{C}$  DEPT 135 spectrum of compound **1** (desholothurin B) in  $\text{CD}_3\text{OD}$ .



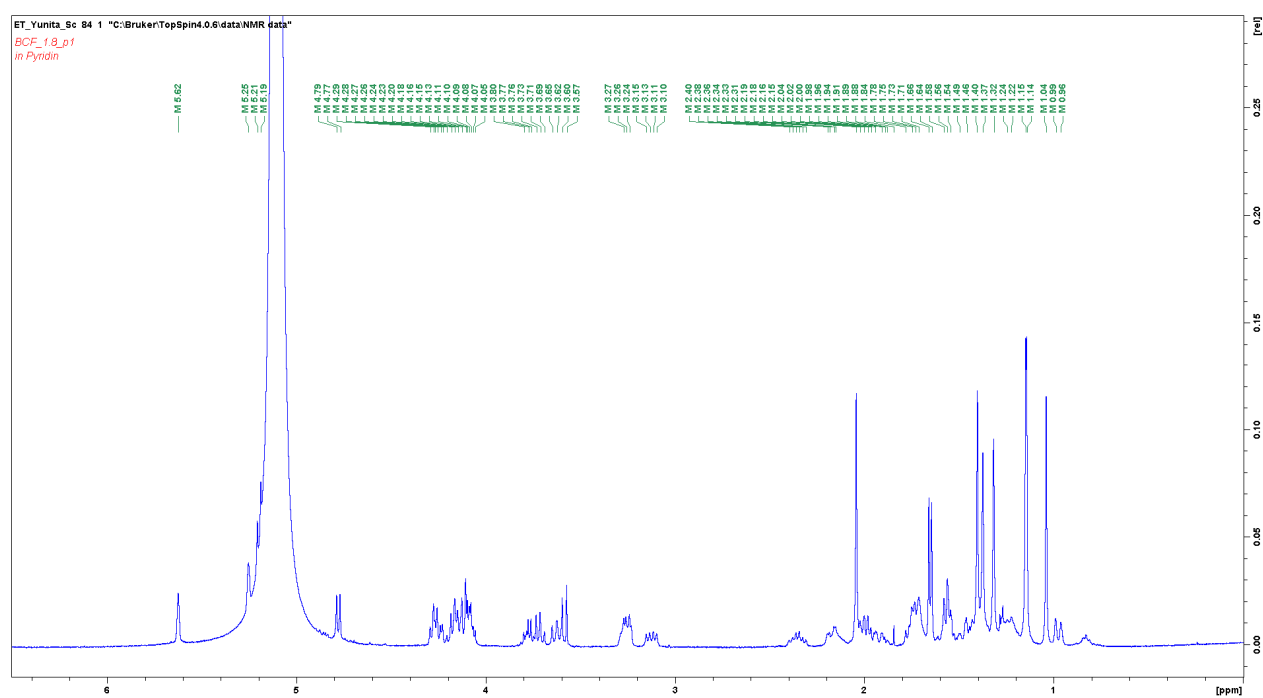

Figure S9.  $^1\text{H}$  spectrum of compound 2 (12-*epi*-desholothurin B) in pyridine- $d_5$ .

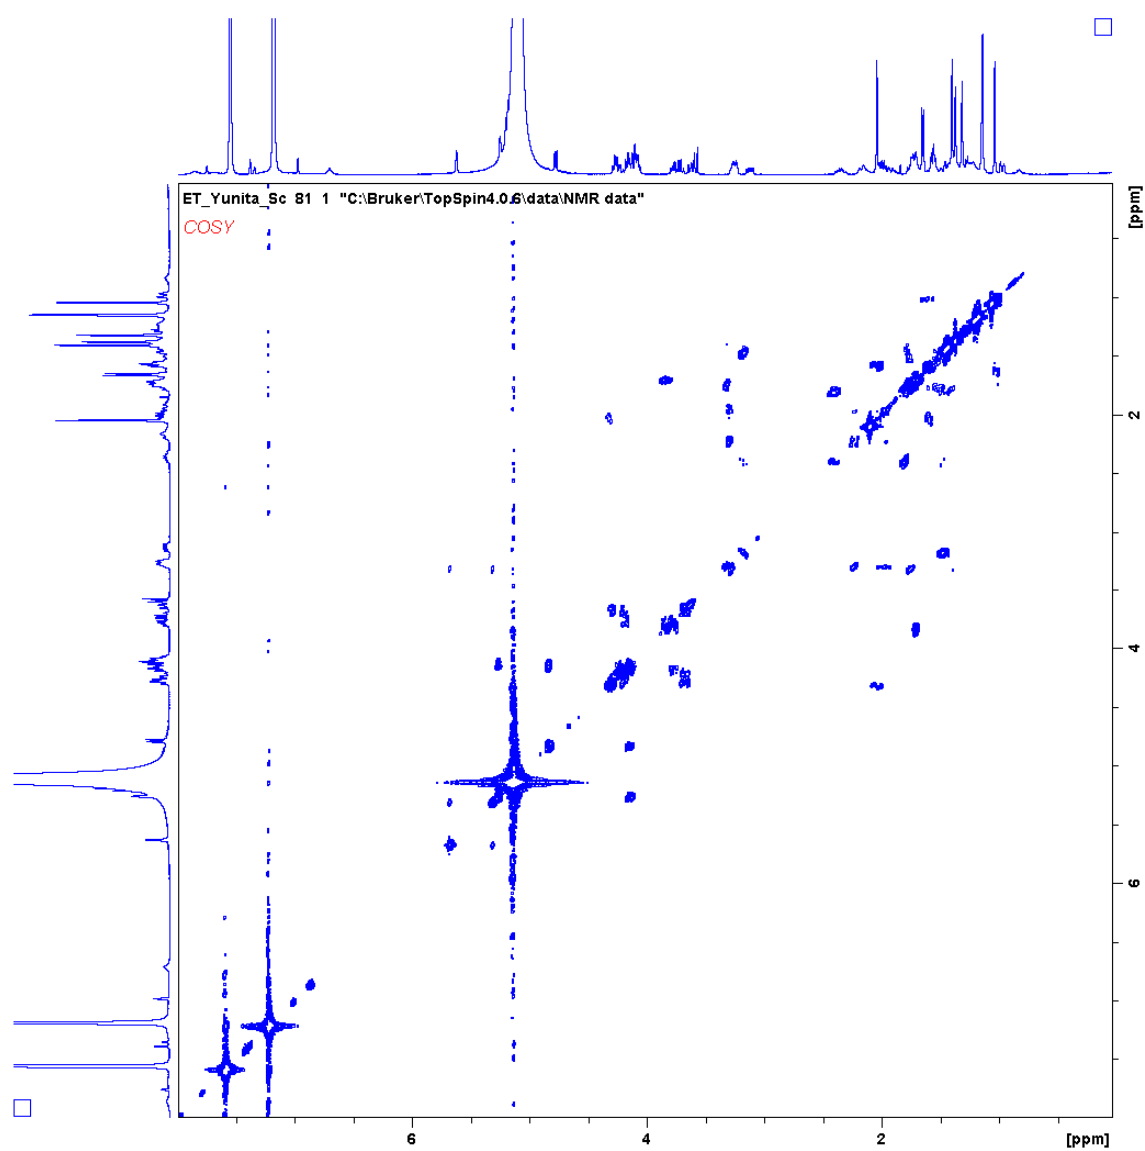

**Figure S10.** COSY spectrum of compound **2** (12-*epi*-desholothurin B) in pyridine-*d*<sub>5</sub>.

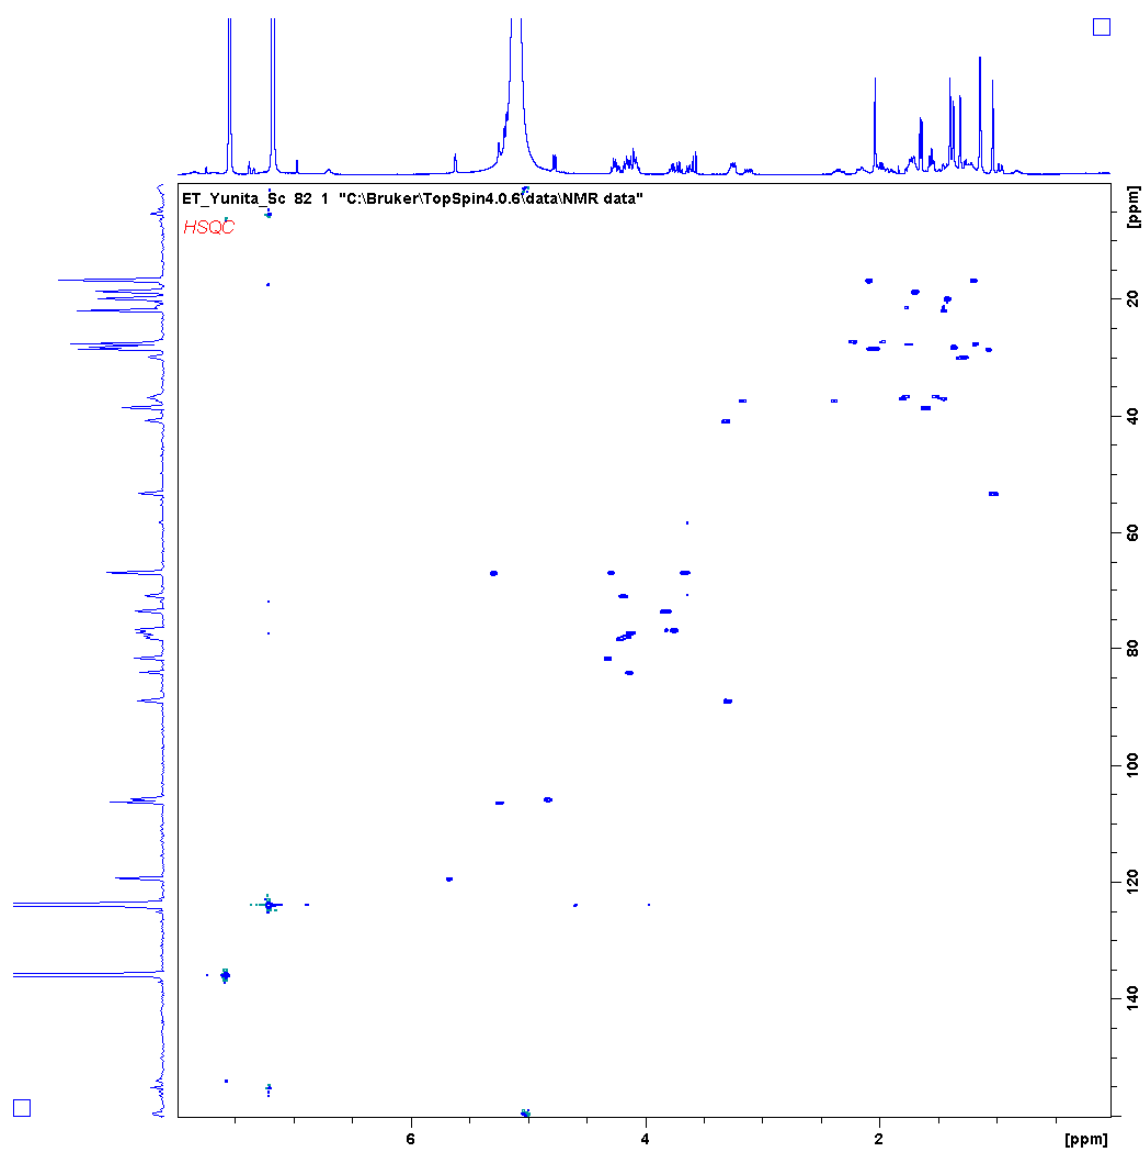

**Figure S11.** HSQC spectrum of compound **2** (12-*epi*-desholothurin B) in pyridine-*d*<sub>5</sub>.

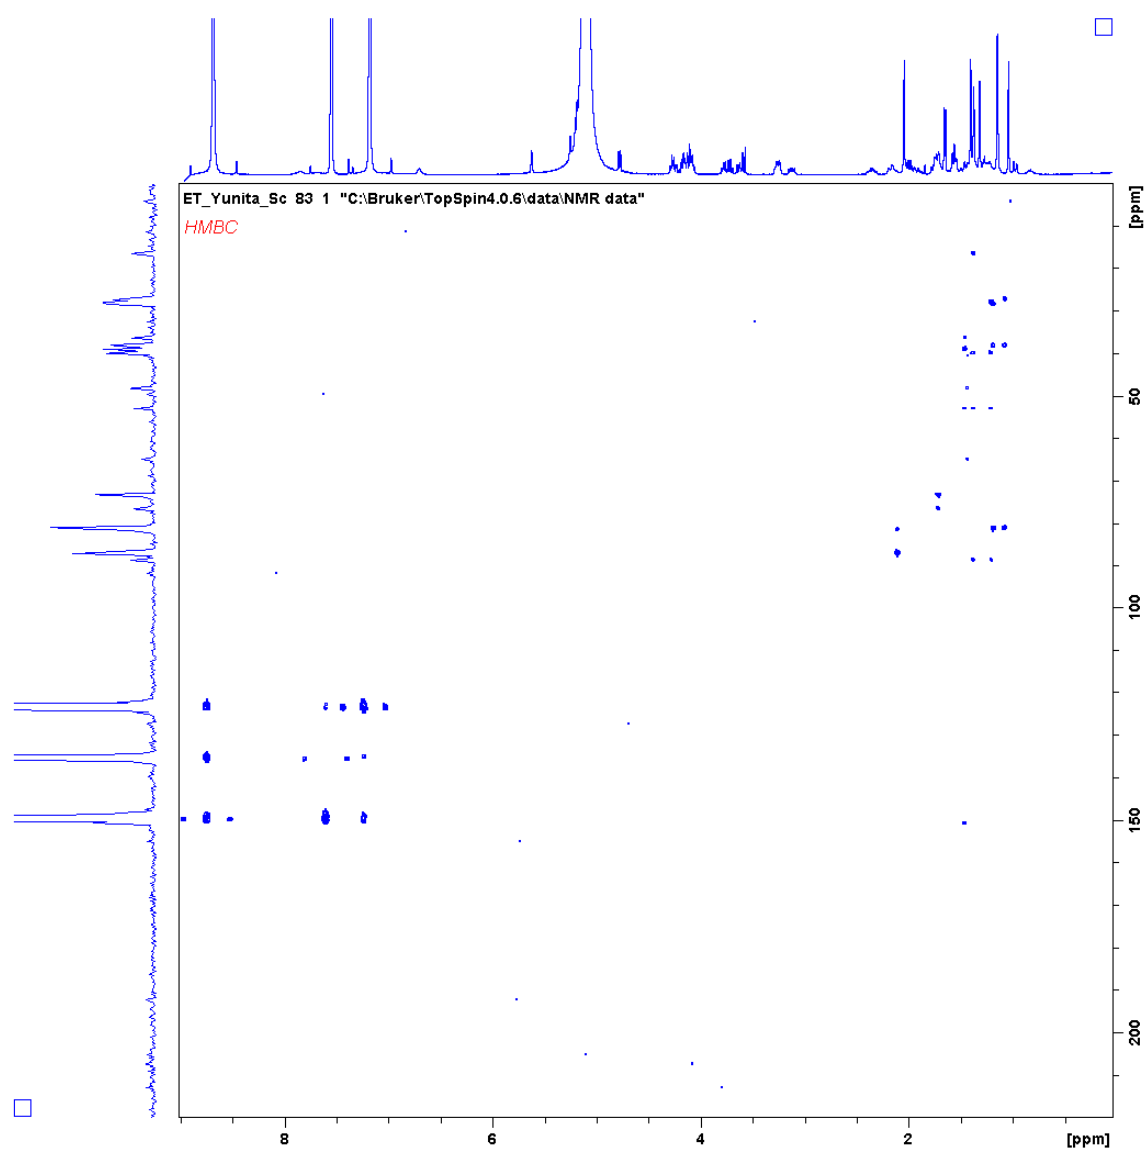

**Figure S12.** HMBC spectrum of compound **2** (12-*epi*-desholothurin B) in pyridine-*d*<sub>5</sub>.

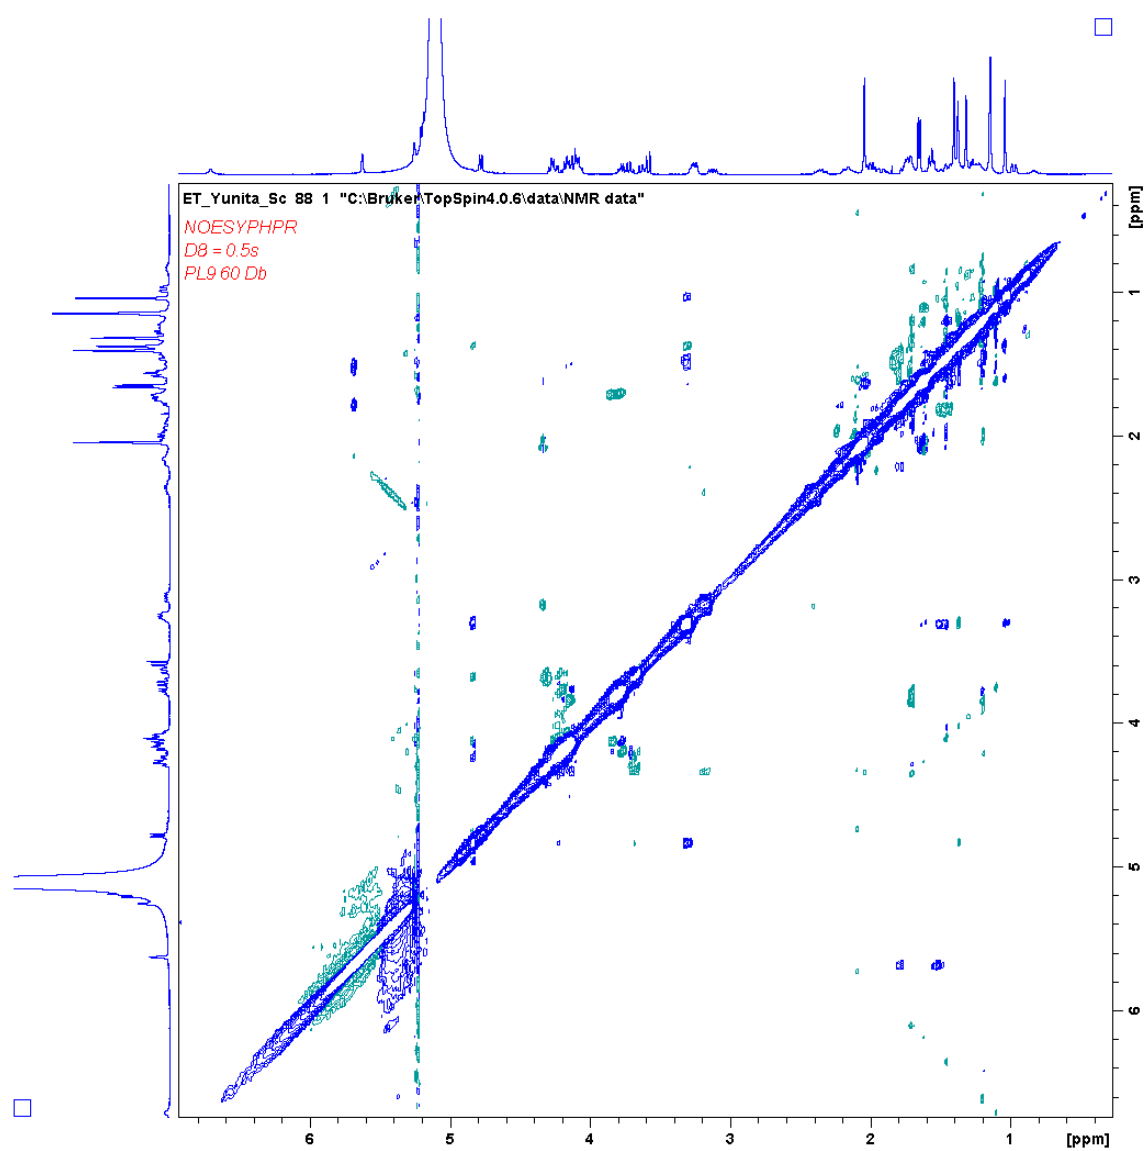

**Figure S13.** NOESY spectrum of compound **2** (12-*epi*-desholothurin B) in pyridine-*d*<sub>5</sub>.

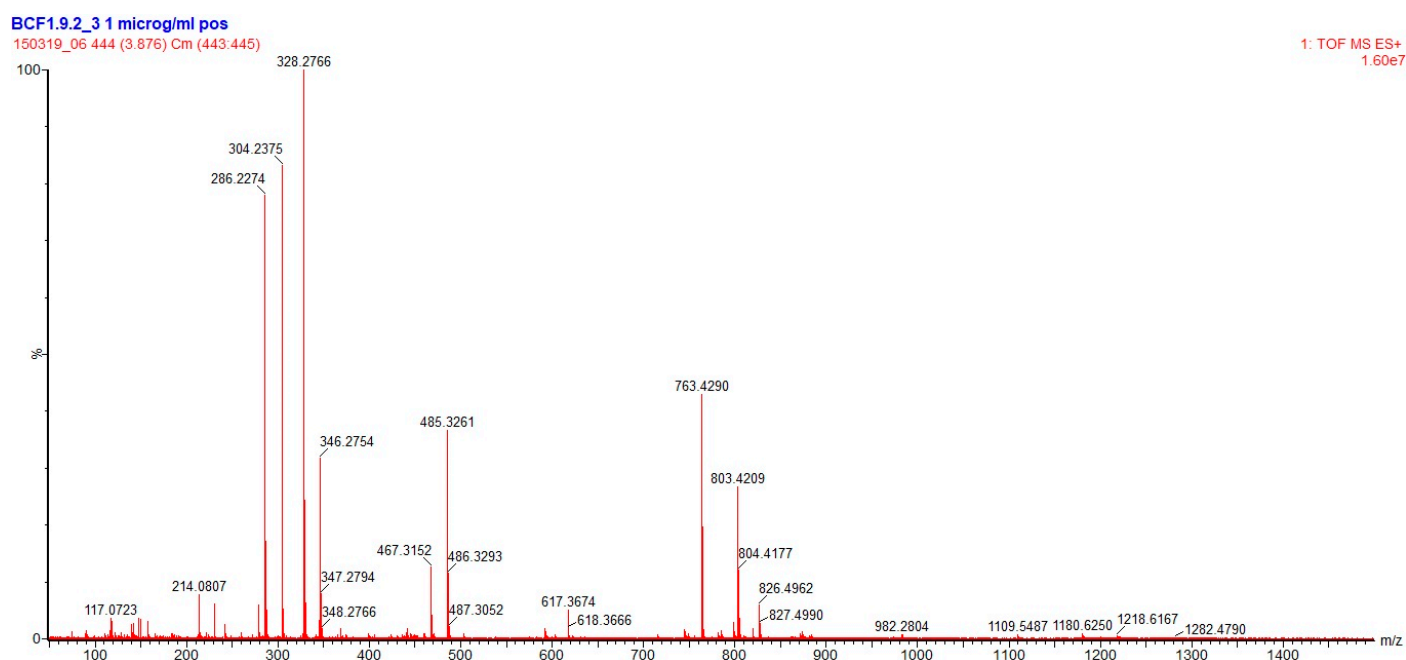

Figure S14. ESI+ HRMS spectrum of compound 1 (desholothurin B).

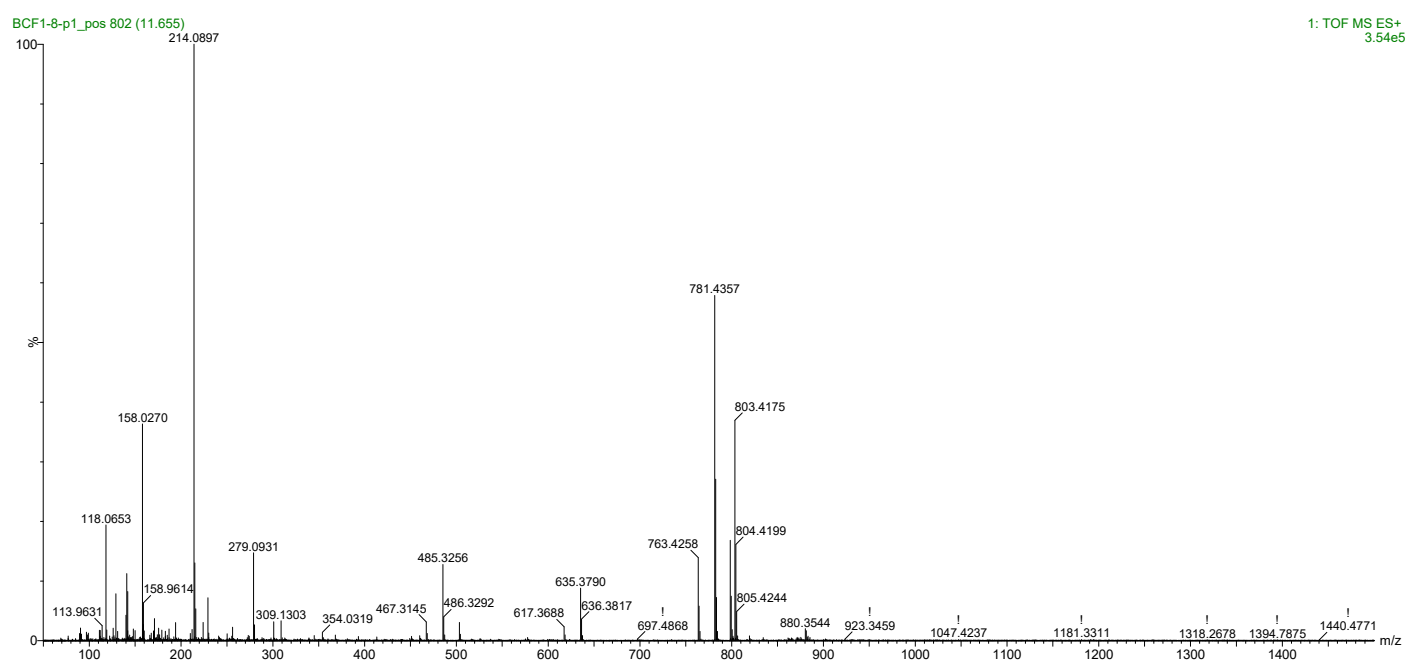

Figure S15. ESI+ HRMS spectrum of compound 2 (12-*epi*-desholothurin B).

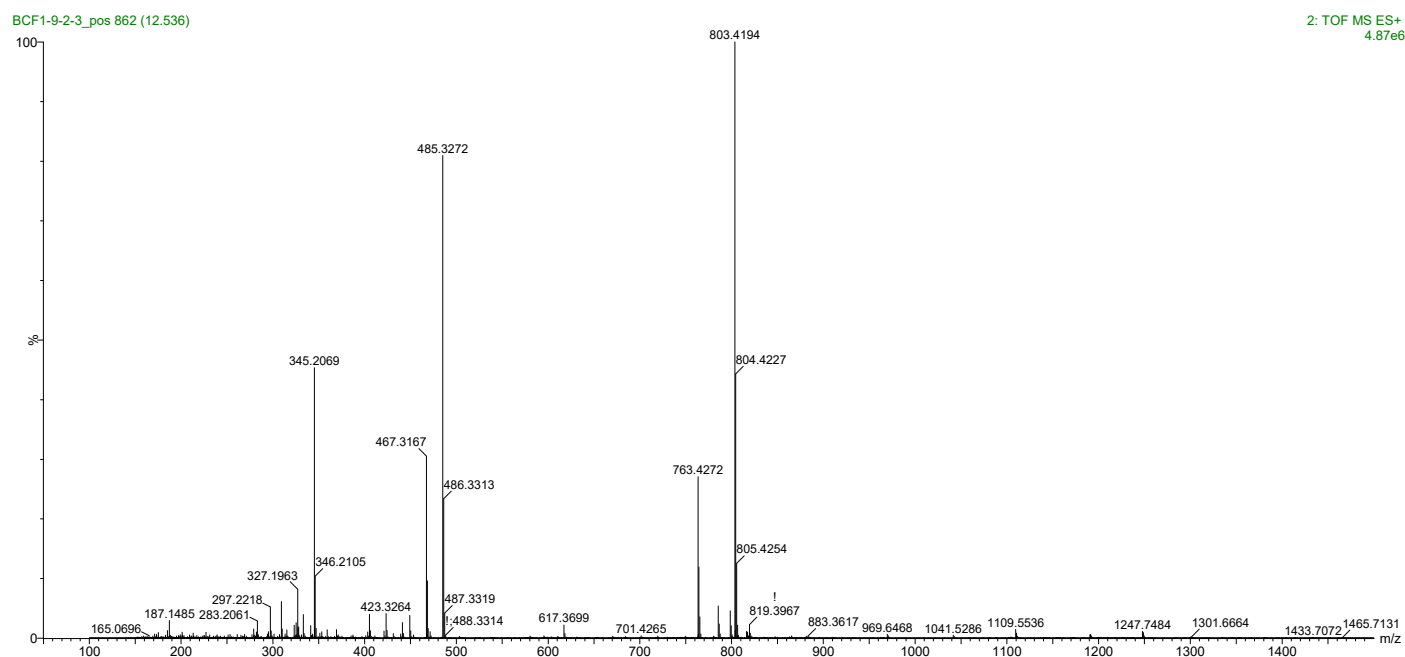

**Figure S16.** ESI+ HRMS spectrum of fragment ions of compound **1** (desholothurin B).



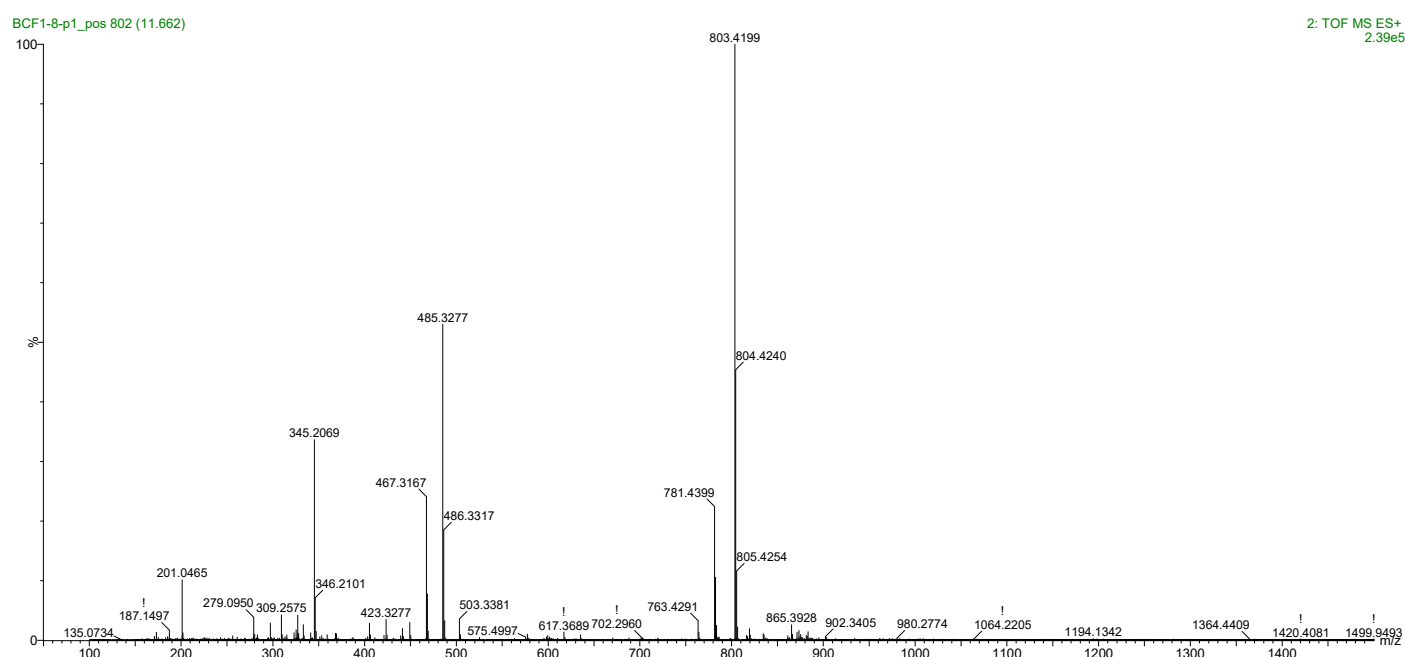

**Figure S17.** ESI+ HRMS spectrum of fragment ions of compound **2** (12-*epi*-desholothurin B).
